# Supplementary material for: Bioinorganic hybrid bacteriophage for modulation of intestinal microbiota to remodel tumor-immune microenvironment against colorectal cancer
Source: PubMed Central journal article supplement — Sci Adv. 2020 May 15;6(20):eaba1590. doi: 10.1126/sciadv.aba1590 (PMC7228756; doi:10.1126/sciadv.aba1590), 2020-05-15
Supplement: aba1590_SM.pdf [file aba1590_SM.pdf]

[advances.sciencemag.org/cgi/content/full/6/20/eaba1590/DC1](https://advances.sciencemag.org/cgi/content/full/6/20/eaba1590/DC1)

## Supplementary Materials for

### **Bioinorganic hybrid bacteriophage for modulation of intestinal microbiota to remodel tumor-immune microenvironment against colorectal cancer**

Xue Dong, Pei Pan, Di-Wei Zheng, Peng Bao, Xuan Zeng, Xian-Zheng Zhang\*

\*Corresponding author. Email: [xz-zhang@whu.edu.cn](mailto:xz-zhang@whu.edu.cn)

Published 15 May 2020, *Sci. Adv.* **6**, eaba1590 (2020)

DOI: [10.1126/sciadv.aba1590](https://doi.org/10.1126/sciadv.aba1590)

#### **This PDF file includes:**

Figs. S1 to S9

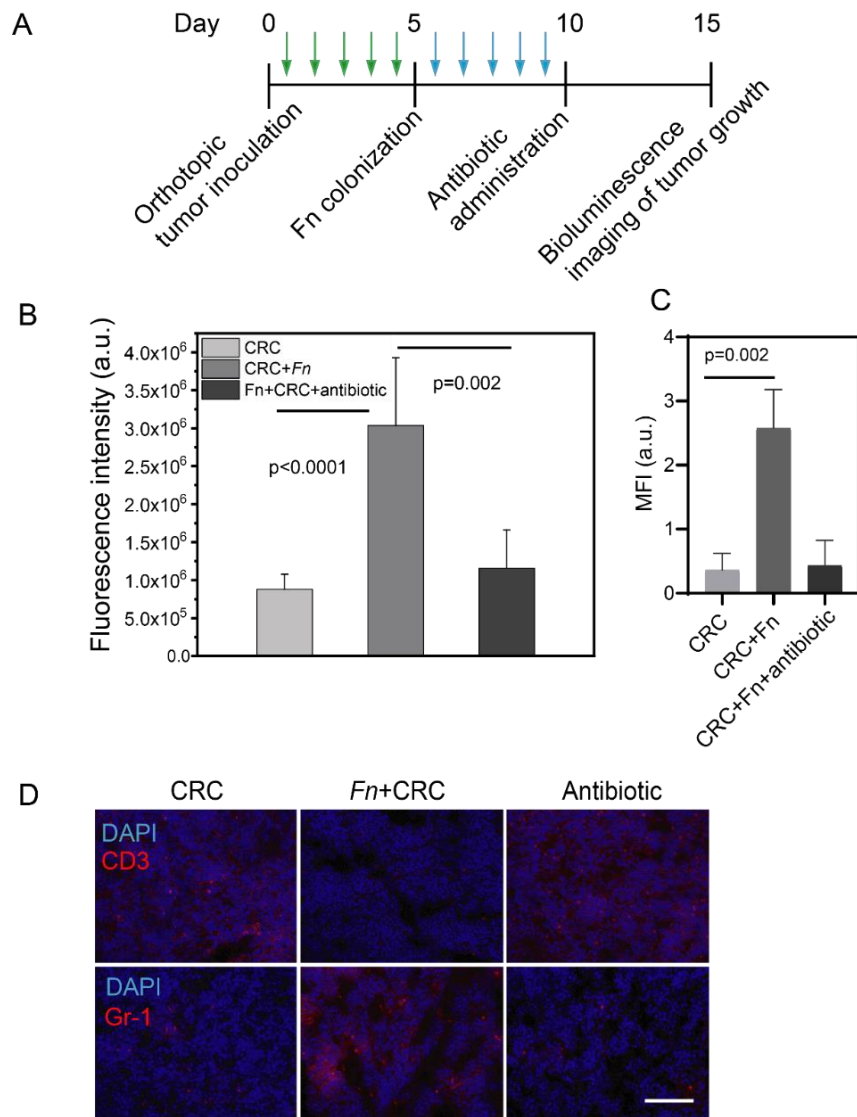

**Fig. S1. Effect of *Fn* in the CRC immune microenvironment.** (A) Schematic of treatment antibiotic on orthotopic CRC mice. (B) The corresponding quantitative evaluation for bioluminescence imaging of orthotopic CT26-luc tumor bearing mice with different treatments at 15 days (n = 5). (C) The corresponding quantitative evaluation for FISH staining of *Fn* after different treatments at 15 days. (D) Representative immunofluorescence staining images for CD3 and Gr-1 of tumor tissues in orthotopic CRC model after various treatments. (Scale bar: 200  $\mu$ m). Significant difference was assessed in (B) and (C) by using t test. The mean values and S.D. are presented.

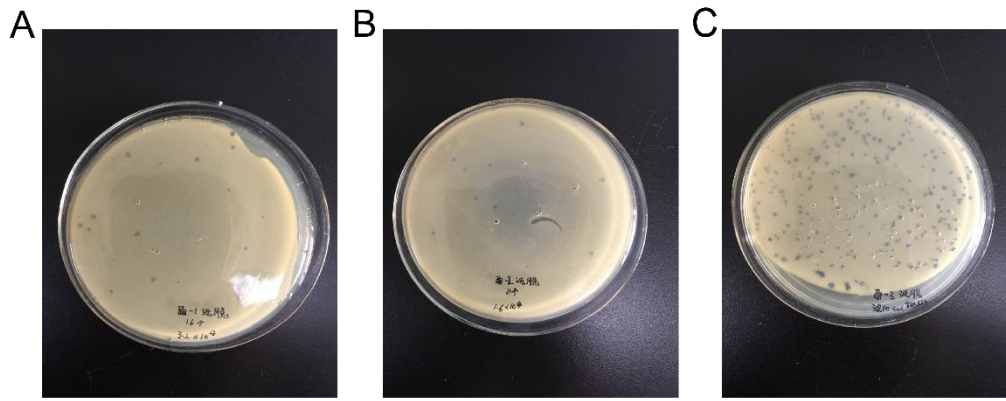

D

```

GTCCCACAATGGAAATTATTTTATTGACGAGCTCCGCCAGTATTGGAACGATATCAGGTCTACA
TTACTATTACCCCTCTTGCAACCTTCTTTGGCAAAGCCTCTCGCTATTTTGTATTCGTCGTC
TGGTAAACGAGGGTATGATAGTGTGCTCTACTATGCTCGTAATCTTTTGGCGTATGTATCTGC
ATTAGTGAATGTGGTATTCTAAATCTCACTGATGAATCTTTCTACCTGTAATAATGTTGTTCCG
TTAGTTCGTTTTATTAACGTAGATTTTTTCCCAACGTCCTGACTGGTATAATGAGCCAGTTCT
TAAAATCGTATAAGGTAATTCACAATGATTAAGTTGAAATTAACCATCTCAAGCCCAATTTACT
ACTCGTTCGGTGTTCCTCGTCAGGGCAAGCCTTATTCCTGAATGAGCAGCTTTGTTACGTT
GATTTGGGTAATGAATATCCGGTTCCTGTCAAGATTACTCTTGATGAAGGTCAGCCAGCCTATG
CGCCTGGTCTGTACACCGTTCATCTGTCCTCTTTCAAAGTTGGTCAGTTCGGTTCCTTATGA
TTGACCGTCTGCGCCTCGTTCGGGCTAAGTAACATGGAGCAGGTCGCGGATTTGACACAAT
TTATCAGGCGATGATACAAATCTCCGTTGTACTTTGTTTCGCGCTTGGTATAATCGTGGGGGT
CAAAGATGAGTGTGTTTAGTGATTCCTTTGCCTCTTTTCGTTTTAGGTTGGTGCCTTCGTAGTGG
CATTACGTTTTTACCCGTTAATGGAACTTCCTCATGAAAAAGTCTTTAGTCTCAAAGCCT
CTGTAGCCGTTGCTACCCTCGTTCGATGCTGTCTTTTCGCTGCTGAGGGTGACGATCCCGCA
AAAGCGGCCTTAACTCCCTGCAAGCCTCAGCGACCGAATATATCGGTTATGCGTGGGCGAT
GGTTGTTGTCATTGTGCGGCGCAACTATCGGTATCAAGCTGTTTAAGAAATTCACCTCGAAAGC
AAGCTGATAAACCGATACAATTAAGGCTCCTTTTGGAGCCTTTTTTTGGAGATTTTCAACGT
GAAAAAATTATTTCGCAATTCCTTTAGTGGTACCTTTCTATTCTCACTCTTTTACTCTTCCGC
GGCTGAATCTTTCGATGATTGCTGGTGGAGGTTTCGGCCGAAACTGTTGAAAGTTGTTTAGCA
AAATCCCATACAGAAAATTCATTTACTAACCCTTCTGAAAAGGCCGCCCAAT

```

**Fig. S2. Screening and identification of M13@Ag to specifically elimination of *Fn*.** Typical images of double-layered plate with specifically *Fn*-binding M13 phages: (A) The first round of screening. (B) The second round of screening. (C) The third round of screening. (D) Genome information of M13 phage named M5 from a phage display library by high-throughput sequencing. (Photo credit: Xian-Zheng Zhang, Wuhan University).

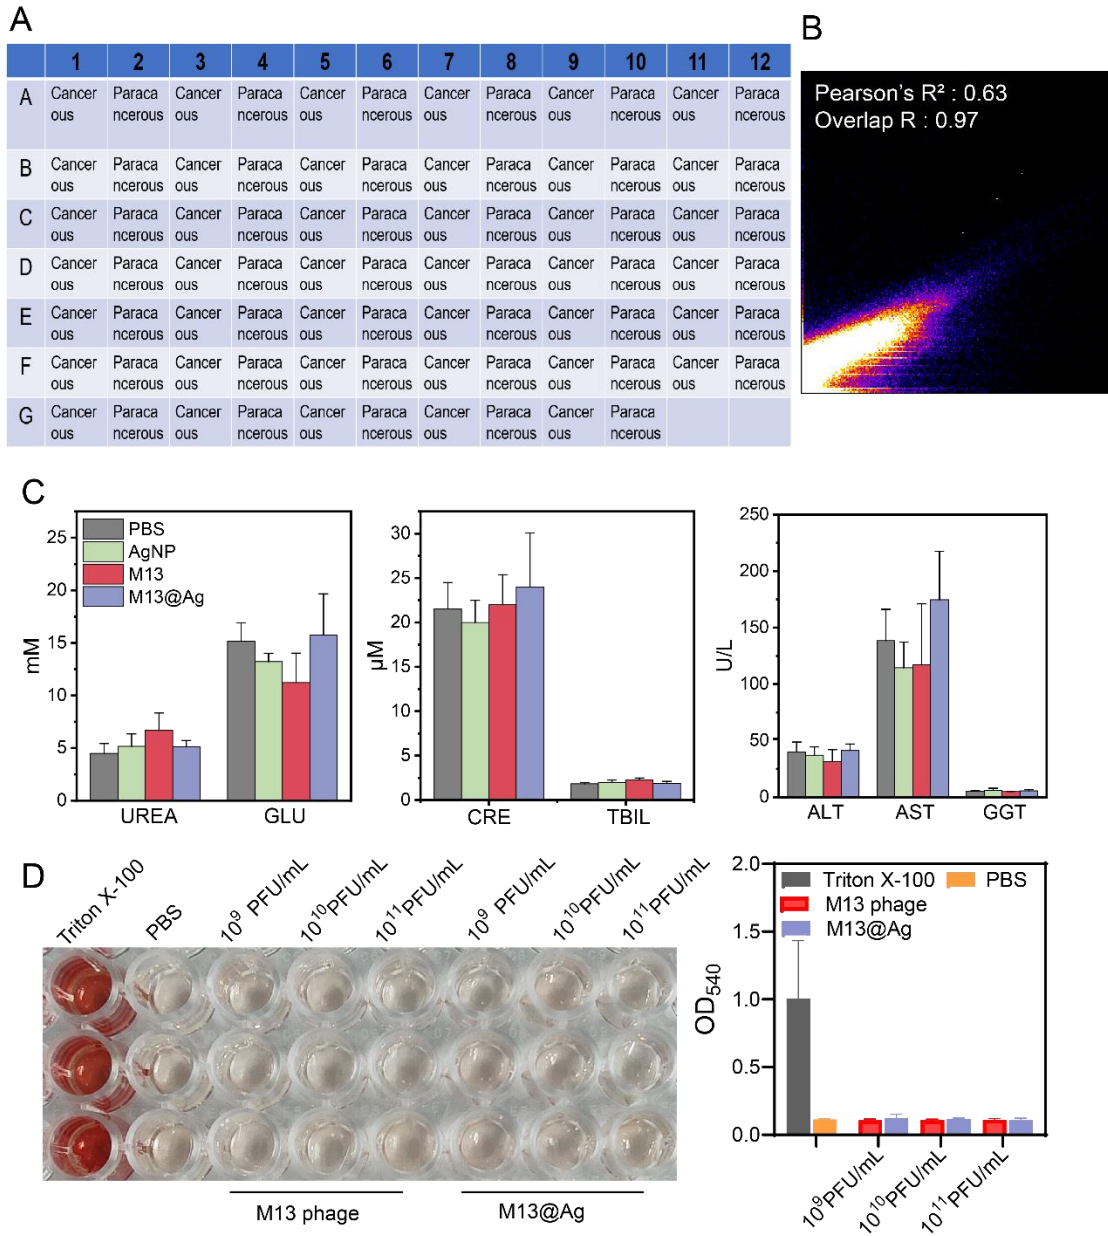

**Fig. S3. Information of the tissue sample and biosafety of M13@Ag.** (A) Sample information of tissue microarray. (B) Fluorescence co-localization analysis of *Fn* and MDSCs in clinical tumor samples. (C) The blood biochemistry of BALB/c mice after different treatments (n = 4). (D) The hemolytic test after different concentration M13@Ag treatments (n = 3). (Photo credit: Xian-Zheng Zhang, Wuhan University).

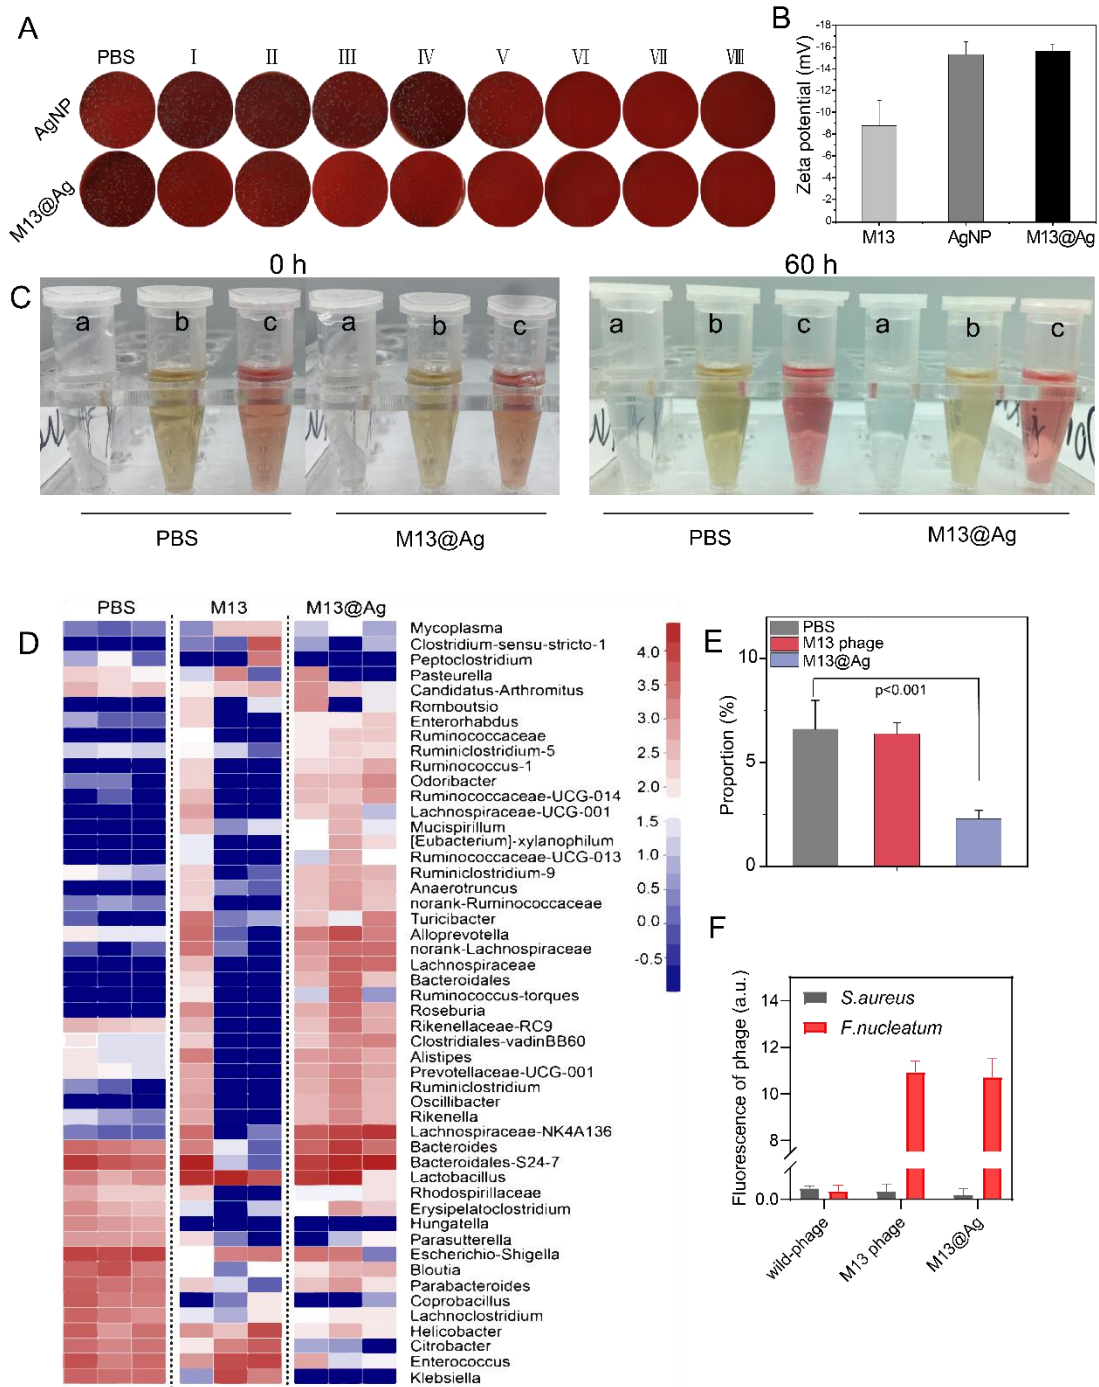

**Fig. S4. Capacity of anti-bacteria and regulate gut microbiota after M13@Ag treatment.** (A) Bacterial colony of *Fn* incubated with AgNP and M13@Ag. I-VIII were represented different concentrations of Ag. I:  $5 \times 10^{-4}$   $\mu\text{g/mL}$ ; II:  $2 \times 10^{-3}$   $\mu\text{g/mL}$ ; III: 0.01  $\mu\text{g/mL}$ ; IV: 0.06  $\mu\text{g/mL}$ ; V: 0.29  $\mu\text{g/mL}$ ; VI: 1.44  $\mu\text{g/mL}$ ; VII: 7.2  $\mu\text{g/mL}$ ; VIII: 36  $\mu\text{g/mL}$ . (B) Zeta potentials of M13 phage, AgNP and M13@Ag. (C) Stability test of M13@Ag resuspended in PBS (a), serum (fetal bovine serum (FBS), b) and cell culture media (DMEM, c). (D) Community heatmap of fecal microbiota

compositions in PBS, M13 phages and M13@Ag treated *Fn*-colonized CRC murine model (n = 3). (E) qPCR analysis level of *Fn* in fecal samples after treatments (n = 3). (F) Quantitative analysis of red fluorescence (M13 phage) in phage-binding assays *in vitro*. Significant difference was assessed in (B) by using t test. The mean values and S.D. are presented. (Photo credit: Xian-Zheng Zhang, Wuhan University).

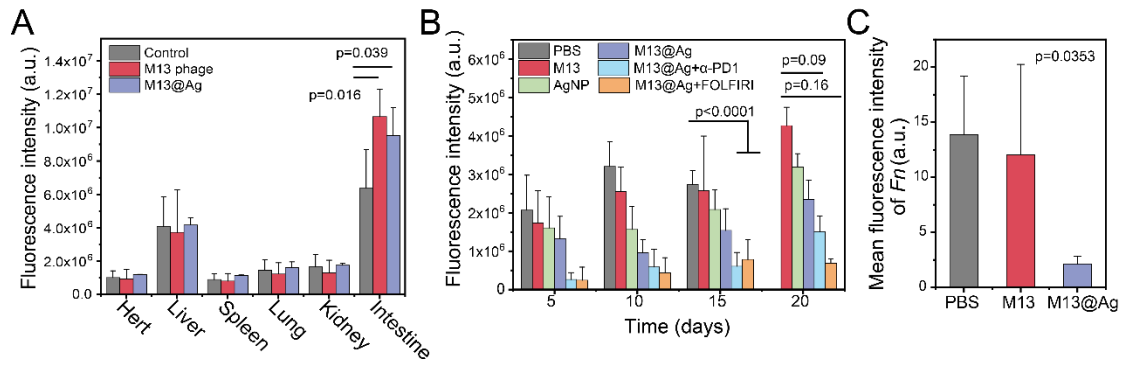

**Fig. S5. *In vivo* tumor targeting and tumor treatment capacity of M13@Ag.** (A) The quantitative evaluation for *ex vivo* fluorescence imaging of the major organs in orthotopic CRC mice model after injection of wild-type phage, M13 phages and M13@Ag at 24 h (n = 3). (B) The corresponding quantitative *in vivo* bioluminescence imaging of orthotopic CT26-luc tumor bearing mice during the receiving treatments (n = 5). (C) Quantitative analysis for mean fluorescence intensity of FISH staining of *Fn* after PBS, M13 phages and M13@Ag treatments. Significant difference was assessed in (A) and (B) by using t test. Significant difference was assessed in (C) by using one-way ANOVA. The mean values and S.D. are presented.

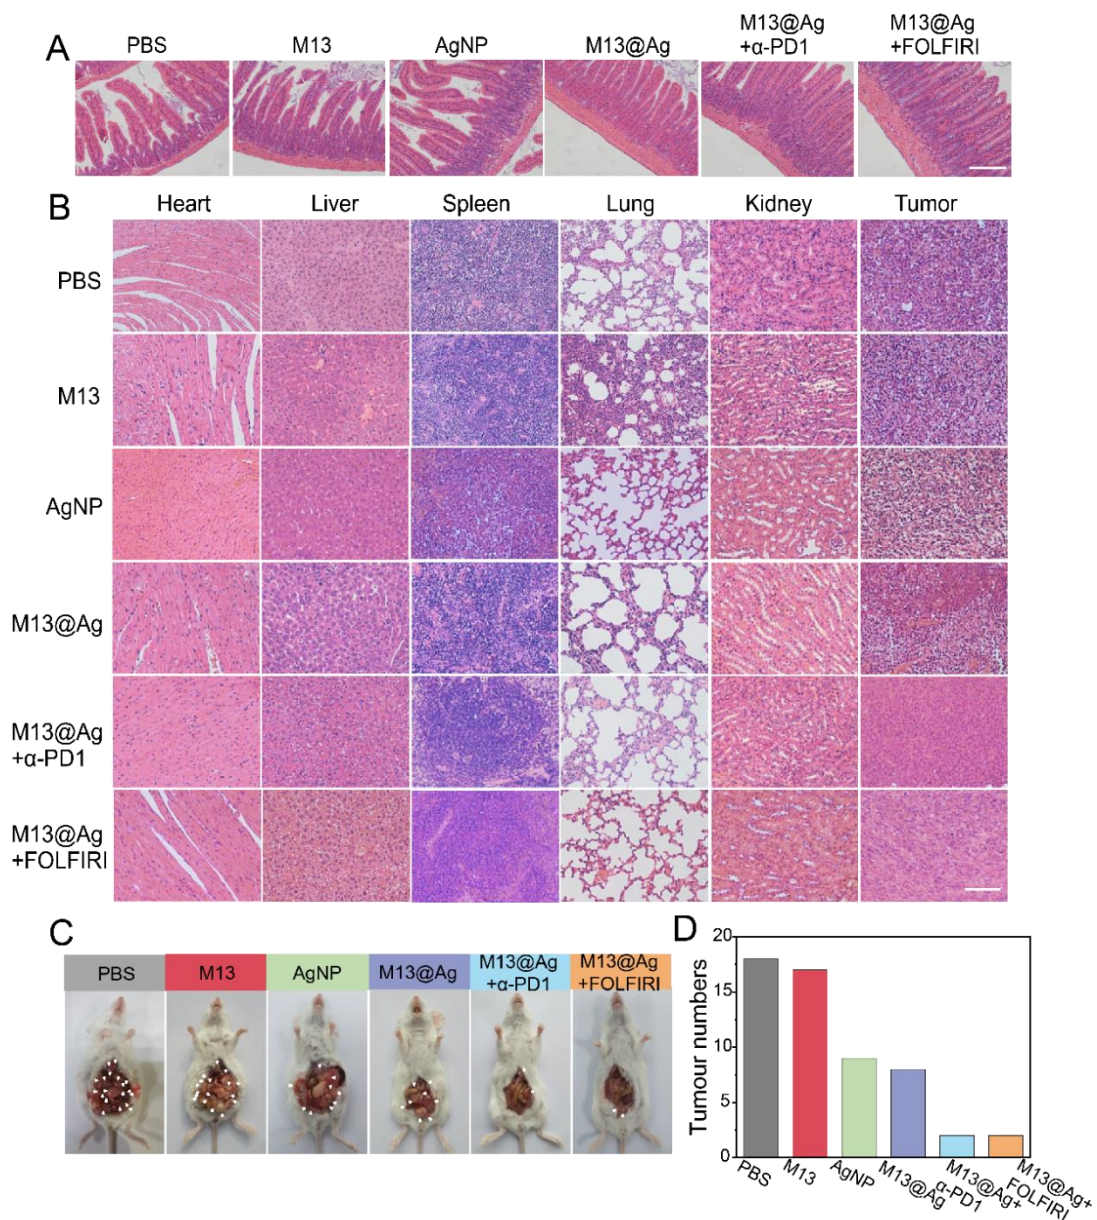

**Fig. S6. *In vivo* therapeutic effect of M13@Ag in orthotopic CT26-luc tumor mode.** (A) H&E staining of colon cancer tissues in PBS, M13, AgNP, M13@Ag, M13@Ag +  $\alpha$ -PD1 and M13@Ag + FOLFIRI treated mice. The intestinal mucosa of orthotopic CT26-luc tumor bearing mice that received M13@Ag +  $\alpha$ -PD1 and M13@Ag + FOLFIRI treatments showed longer and regular villi (Scale bar: 400  $\mu$ m). (B) H&E staining of the major organs (heart, liver, spleen, lung and kidney) in orthotopic CT26-luc tumor bearing mice after different treatments (Scale bar: 200  $\mu$ m). (C) Representative images of colon tumors in orthotopic tumor bearing mice. (D) The numbers of abdominal tumor metastasis after various treatments. (Photo credit: Xian-Zheng Zhang, Wuhan University).



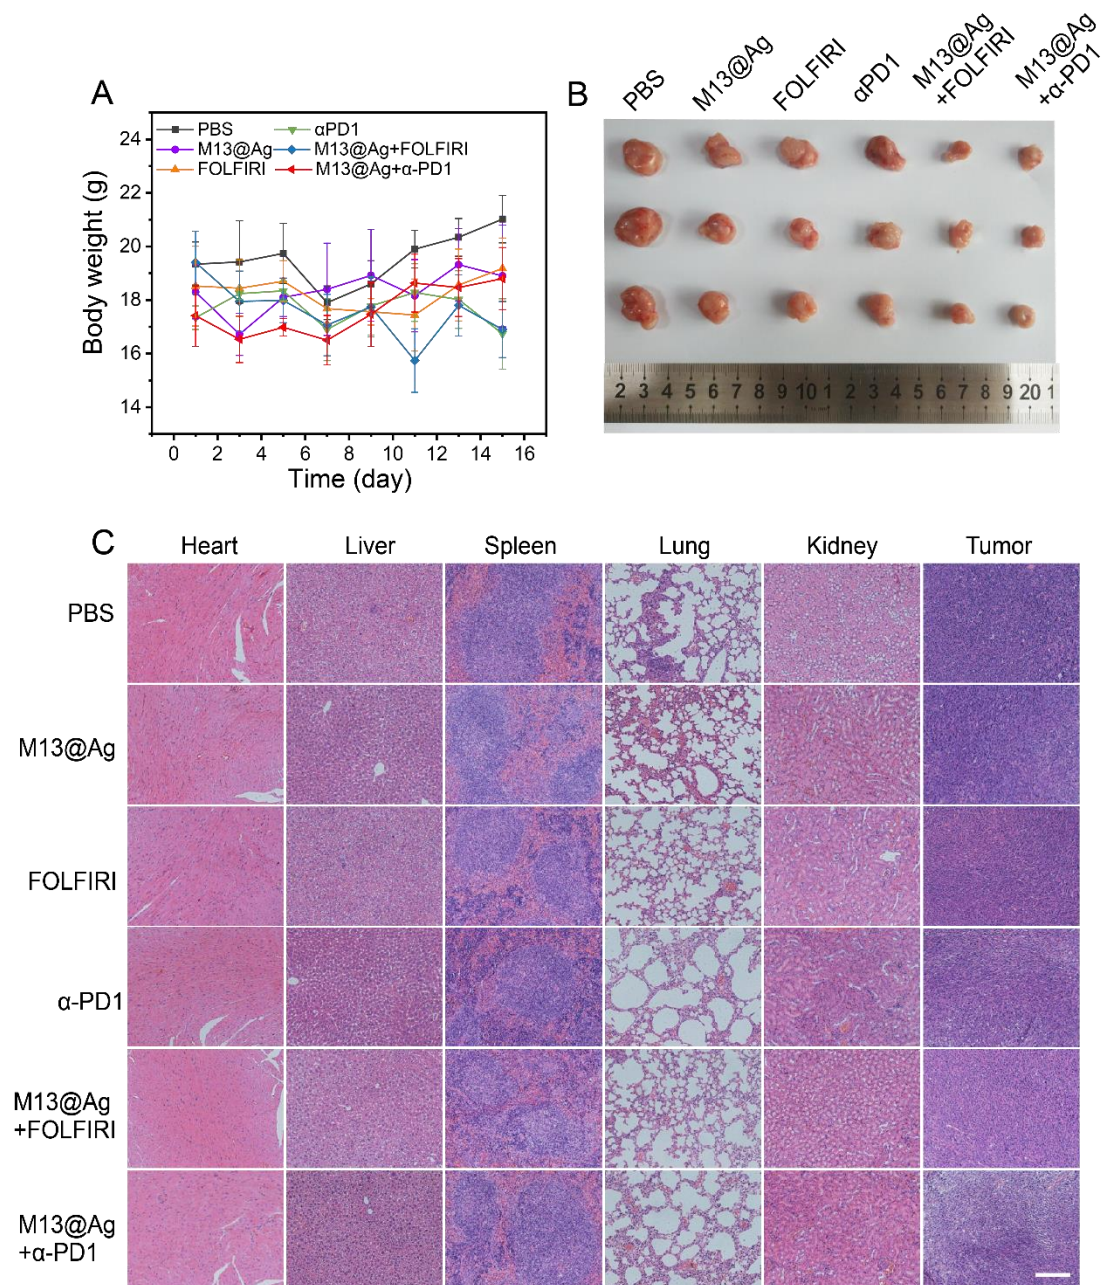

**Fig. S7. *In vivo* therapeutic effect of M13@Ag in subcutaneous CT26 tumor mode.** Relative body weight (A) and representative image of tumor tissues (B) harvested from different groups in subcutaneous CT26 tumor mode after various treatments (n = 5). (C) H&E staining of the major organs (heart, liver, spleen, lung and kidney) in subcutaneous CT26 tumor mode at post treatment in 14 days (Scale bar: 200  $\mu$ m). (Photo credit: Xian-Zheng Zhang, Wuhan University).

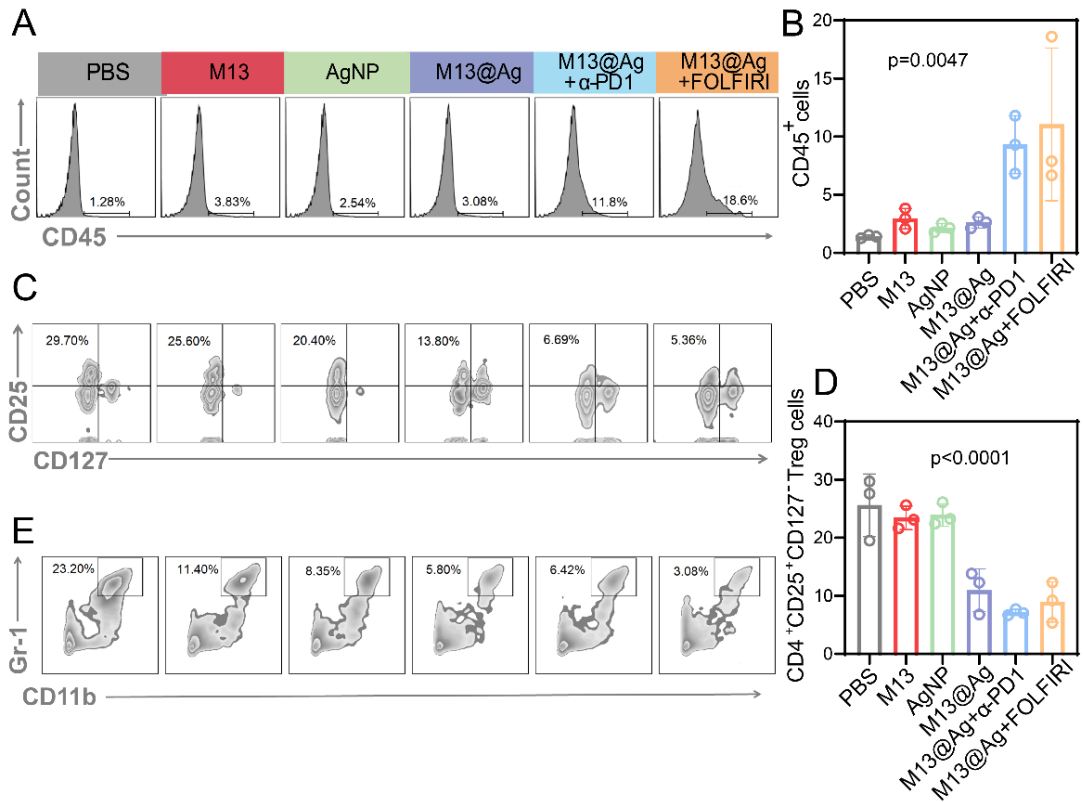

**Fig. S8. Flow cytometric analysis images and relative quantification in orthotopic CT26-luc tumors.** (A-B) Representative flow cytometric analysis images and quantification of CD45<sup>+</sup> lymphocytes. (C-D) Flow cytometric analysis of immunosuppressive CD4<sup>+</sup>CD25<sup>+</sup>CD127<sup>-</sup> Tregs in tumor tissues. (E) Representative flow cytometric analysis images of CD11b<sup>+</sup>Gr-1 MDSCs in spleen (n = 3). Significant difference was assessed using one-way ANOVA. The mean values and S.D. are presented.

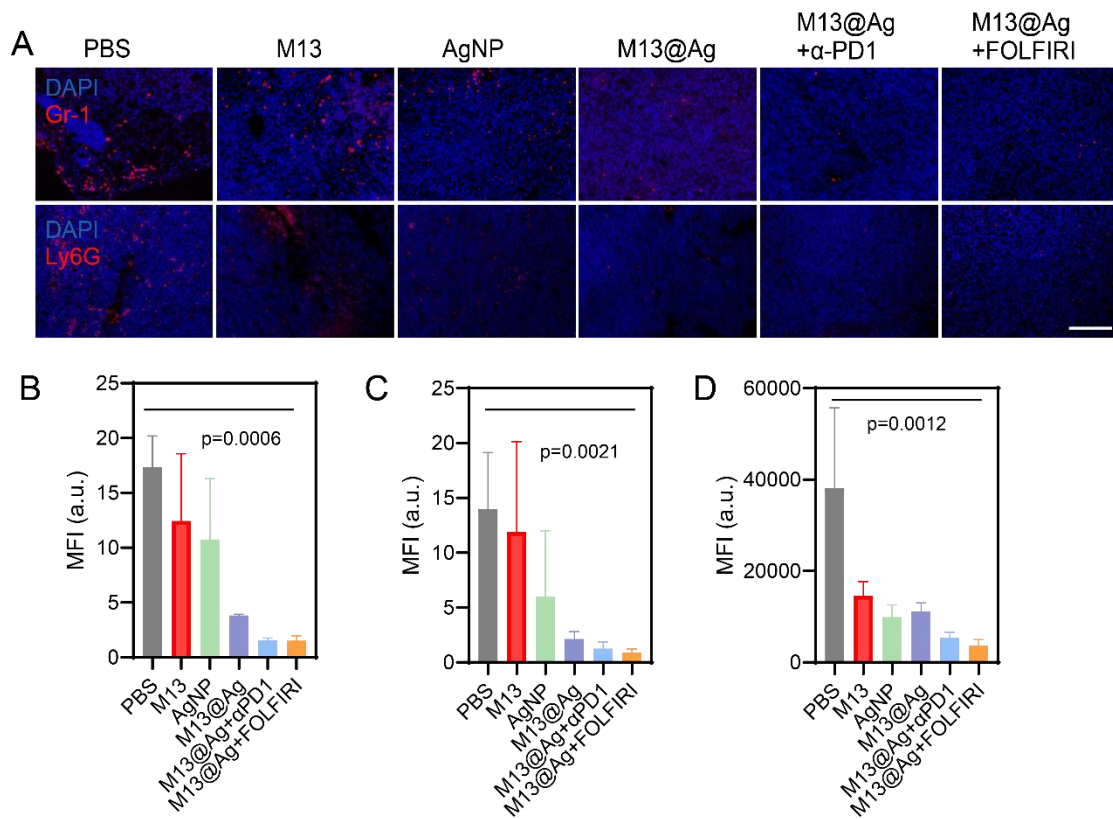

**Fig. S9. Representative images and quantification of immunofluorescence staining from orthotopic CRC tumor tissues.** (A) Representative immunofluorescence staining images for Gr-1 and Ly6G from orthotopic CRC tumor tissues at the 14th day post different treatments (Scale bar: 200  $\mu$ m). (B-D) Quantification of representative images for Ki67, FISH and Arg-1.
